# Supplementary material
Source: PubMed Central journal article supplement (PMC6754795)
Supplement: NIHMS1527467-supplement-1.pdf [file NIHMS1527467-supplement-1.pdf]

# **Sulfated glycosaminoglycans and low-density lipoprotein receptor contribute to *Clostridium difficile* toxin A entry into cells**

Liang Tao<sup>1,2,8,9</sup>, Songhai Tian<sup>1,2,9</sup>, Jie Zhang<sup>1,2,9</sup>, Zhuoming Liu<sup>2</sup>, Lindsey Robinson<sup>2</sup>, Shin-Ichiro Miyashita<sup>1,2</sup>, David T. Breault<sup>3,6,7</sup>, Ralf Gerhard<sup>4</sup>, Siam Oottamasathien<sup>5</sup>, Sean Whelan<sup>2</sup>, and Min Dong<sup>1,2</sup>

<sup>1</sup>Department of Urology, Boston Children's Hospital, and Department of Surgery, Harvard Medical School, Boston, MA 02115, USA

<sup>2</sup>Department of Microbiology and Immunobiology, Harvard Medical School, Boston, MA 02115, USA

<sup>3</sup>Division of Endocrinology, Boston Children's Hospital, Boston, MA 02115, USA

<sup>4</sup>Institute of Toxicology, Hannover Medical School, 30625 Hannover, Germany

<sup>5</sup>Department of Surgery and Pediatric Urology, University of Utah/Primary Children's Hospital, Salt Lake City, UT 84113, USA

<sup>6</sup>Department of Pediatrics, Harvard Medical School, Boston, MA 02115, USA

<sup>7</sup>Harvard Stem Cell Institute, Cambridge, MA 02138, USA

<sup>8</sup>Institute of Basic Medical Sciences, Westlake Institute for Advanced Study, Westlake University, Hangzhou, Zhejiang 310024, China

<sup>9</sup>These authors contributed equally to this work.

**This file includes:**

**Supplementary Figures 1-9**

**Raw Image Figure**

**Supplementary Data Legend**

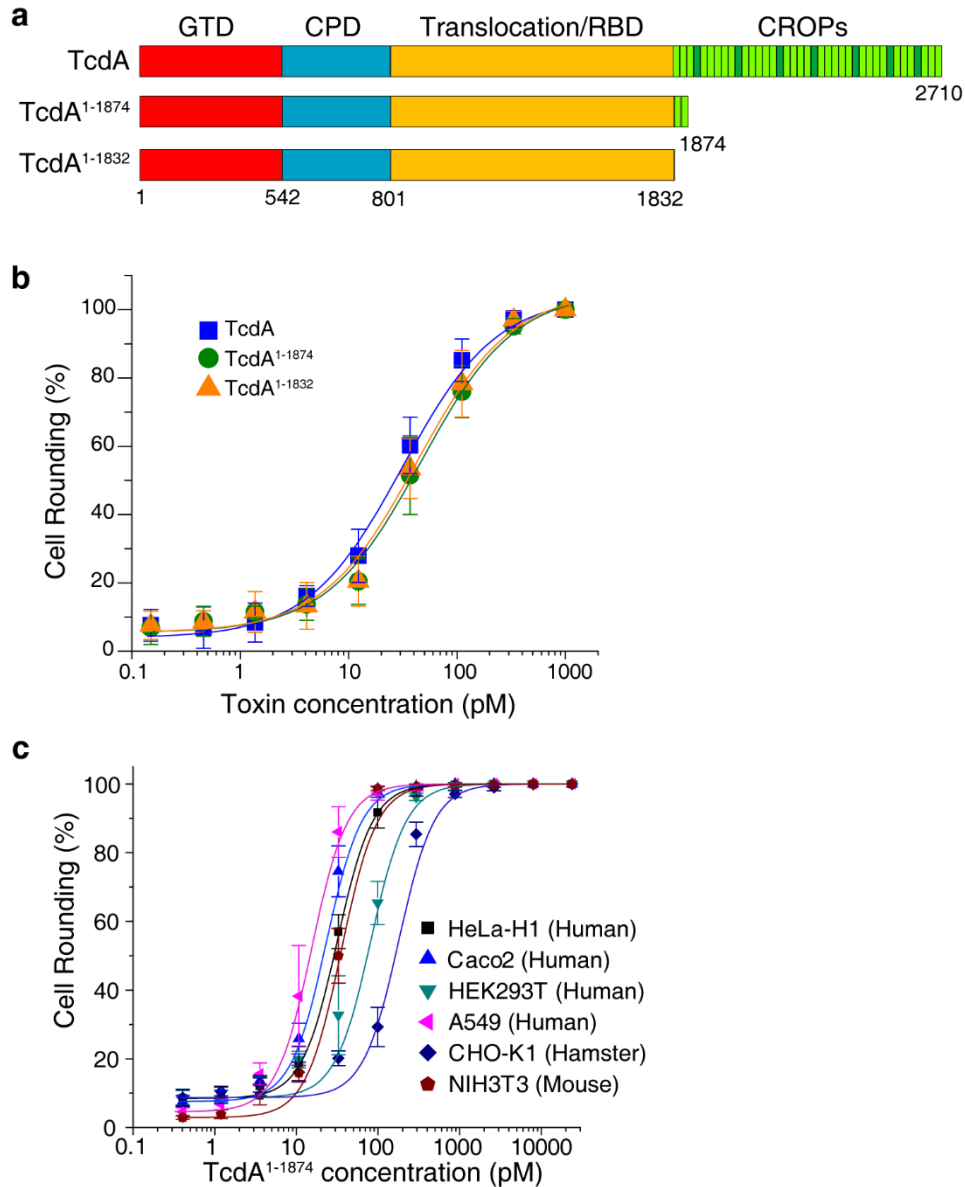

**Supplementary Figure 1. Two truncated TcdA (TcdA<sup>1-1832</sup> and TcdA<sup>1-1874</sup>) lacking the CROPs retain potent toxicity on human cells.**

**a.** Schematic drawing of TcdA, TcdA<sup>1-1874</sup>, and TcdA<sup>1-1832</sup>. GTD: glucosyltransferase domain; CPD: cysteine protease domain; RBD: receptor binding domain; CROPs: combined repetitive oligopeptides.

**b.** The potency of the three TcdA variants on HeLa cells was determined using the cytopathic cell-rounding assays. The percentage of rounded cells were quantified, plotted, and fitted (data represent as mean  $\pm$  s.d., experiments were repeated in triplicates, n=4 (biological replicates)).

**c.** The sensitivities of HeLa, Caco-2, HEK293T, A549, CHO-K1, and NIH3T3 to TcdA<sup>1-1874</sup> were estimated using the cytopathic cell-rounding assays. The percentage of rounded cells were quantified, plotted, and fitted (data represent as mean  $\pm$  s.d., experiments were repeated in duplicates, n=4 (biological replicates)).

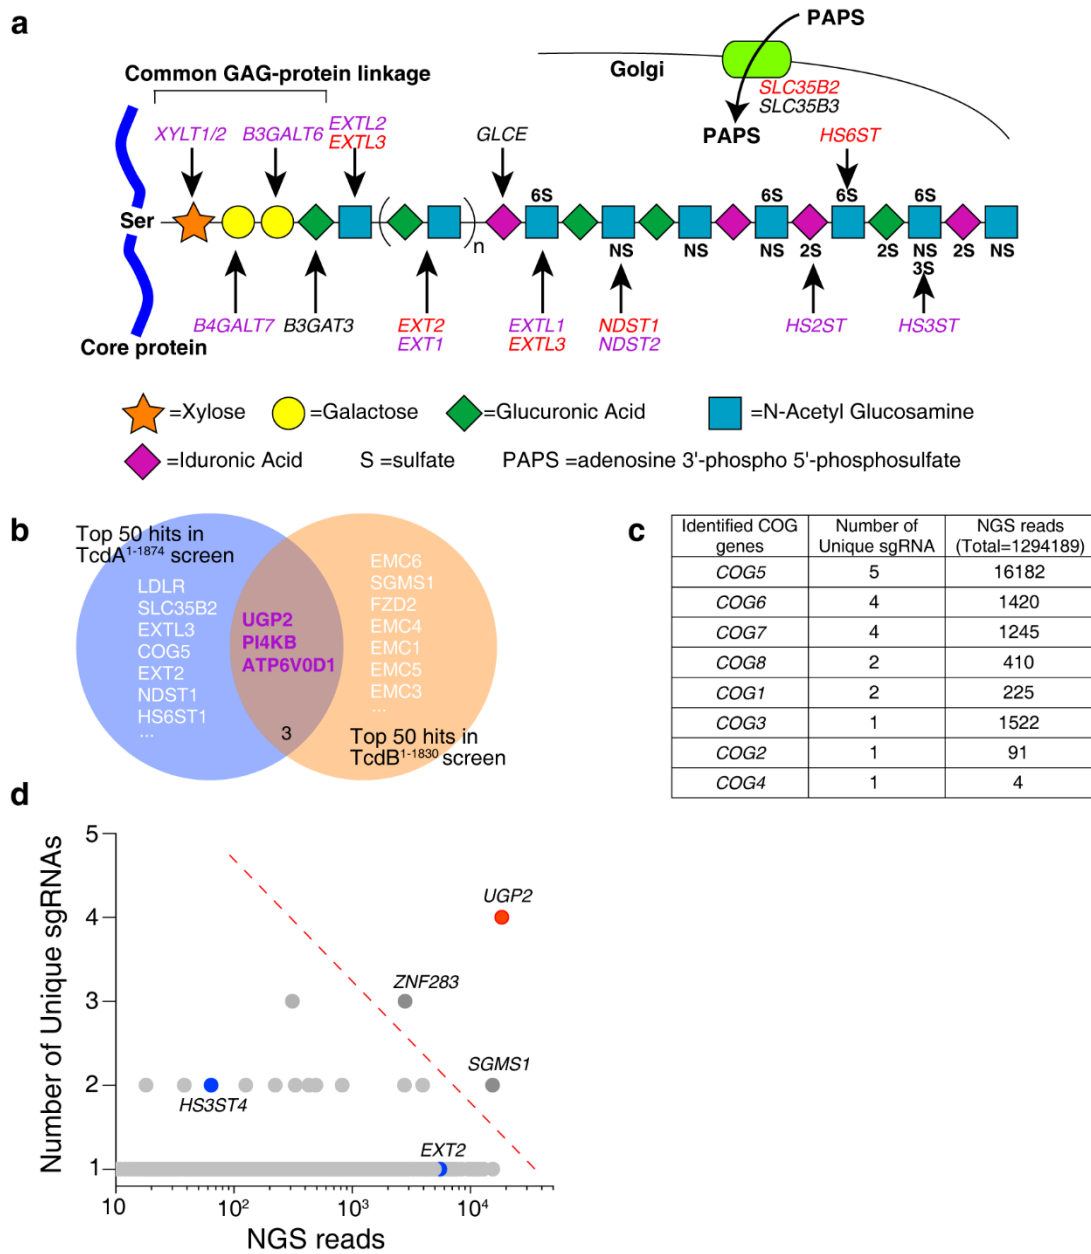

**Supplementary Figure 2. Schematic drawing of the HS synthesis pathways and analysis of top-ranked genes from CRISPR-Cas9 screens using TcdA<sup>1-1874</sup> and full-length TcdA.**

**a.** Schematic illustration shows genes involved in HS biosynthesis. Genes identified in R3 with more than 2 unique sgRNAs were marked in red, genes identified with 1 or 2 sgRNAs were marked in purple.

**b.** Comparison of top-50 ranked genes identified in genome-wide CRISPR-Cas9 screens for TcdA<sup>1-1874</sup> versus in our previous screen with TcdB<sup>1-1830</sup> (Ref.20). *UGP2*, *PI4KB*, and *ATP6V0D1* were the only three that overlapped between two screens.

**c.** All eight members of COG complex were identified in the TcdA<sup>1-1874</sup> screen (R3).

**d.** Genome-wide CRISPR-Cas9-mediated screen was carried out on HeLa cells for full-length TcdA. Genes identified after TcdA screening were ranked and plotted. The y axis is the number of

unique sgRNA for each gene. The  $x$  axis represents the number of sgRNA reads for each gene. The top-ranking genes marked in red (*UGP2*) and dark gray (*ZNF283* and *SGMS1*). Two identified genes involved in HS biosynthesis are marked in blue.

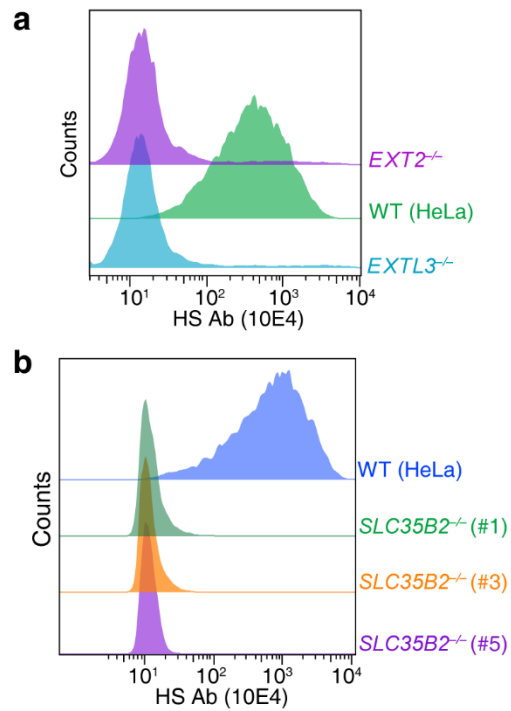

**Supplementary Figure 3. Cells lacking *EXT2*, *EXTL3*, or *SLC35B2* lose surface HS expression.**

**a.** The levels of cell surface HS in WT,  $EXT2^{-/-}$ , and  $EXTL3^{-/-}$  HeLa cells were assessed by flow cytometry using a HS-specific antibody (10E4).  $EXT2^{-/-}$  and  $EXTL3^{-/-}$  cells showed greatly reduced levels of HS.

**b.** The cell surface HS in three  $SLC35B2^{-/-}$  cell lines was assessed by flow cytometry using 10E4 antibody. All of the three cell lines showed greatly reduced levels of HS.

For panels **a** and **b**, experiments were repeated at least twice independently with similar results.

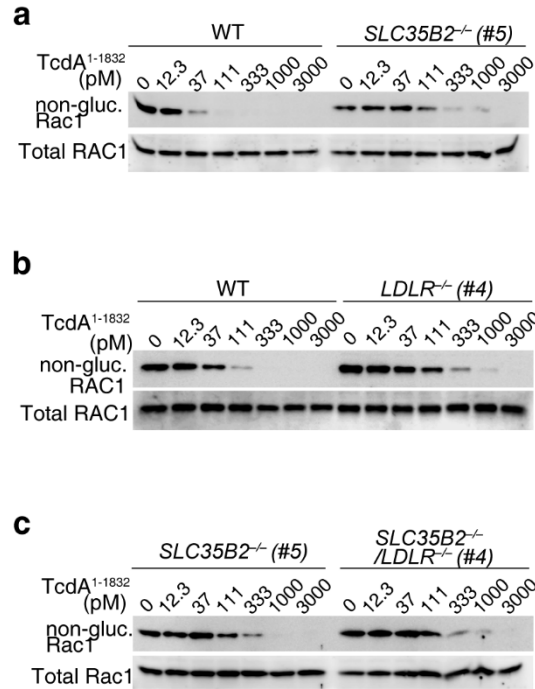

**Supplementary Figure 4. RAC1 glucosylation in HeLa WT cells and the indicated KO cells after exposure to TcdA<sup>1-1832</sup>.**

**a.** The sensitivities of HeLa *SLC35B2*<sup>-/-</sup> (#5) cells versus the WT cells to TcdA<sup>1-1832</sup> were compared by analyzing the glucosylation level of RAC1 via immunoblot assays.

**b.** The sensitivities of HeLa *LDLR*<sup>-/-</sup> (#4) cells versus the WT cells to TcdA<sup>1-1832</sup> were compared by analyzing the glucosylation level of RAC1 via immunoblot assays.

**c.** The sensitivities of HeLa *SLC35B2*<sup>-/-</sup> (#5) cells versus *LDLR*<sup>-/-</sup>/*SLC35B2*<sup>-/-</sup> (#4) cells to TcdA<sup>1-1832</sup> were evaluated based on the level of glucosylation of RAC1 protein.

For panels **a**, **b** and **c**, experiments were repeated at least twice independently with similar results.

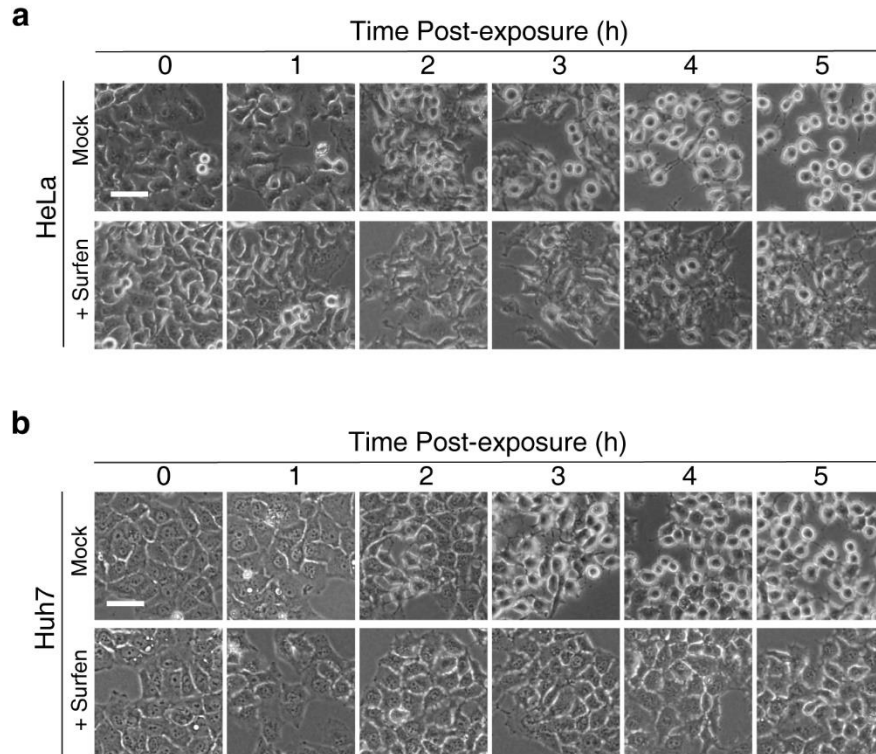

**Supplementary Figure 5. Surfen protected cells from TcdA<sup>1-1832</sup>.**

**a.** Representative images showing that pre-incubation of surfen (5 nM) reduced the cytopathic effect cause by TcdA<sup>1-1832</sup> (2 nM) in HeLa cells. Scale bar, 50  $\mu$ m.

**b.** Representative images showing that pre-incubation of surfen (5 nM) reduced the cytopathic effect cause by TcdA<sup>1-1832</sup> (2 nM) in Huh7 cells. Scale bar, 50  $\mu$ m.

For panels **a** and **b**, experiments were repeated at least three times independently with similar results.



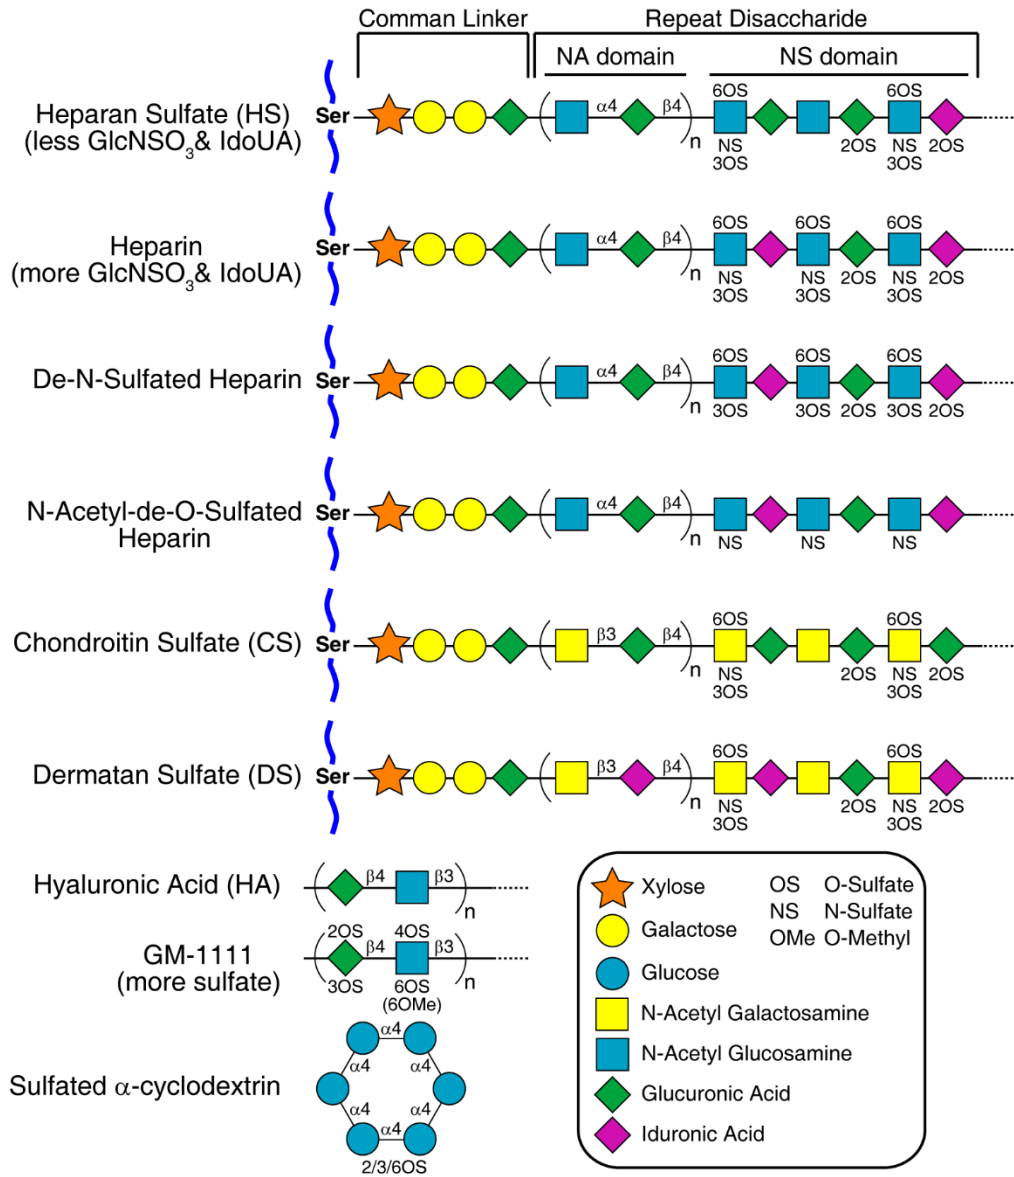

**Supplementary Figure 6. Schematic drawing of sGAGs and other sulfated molecules.**

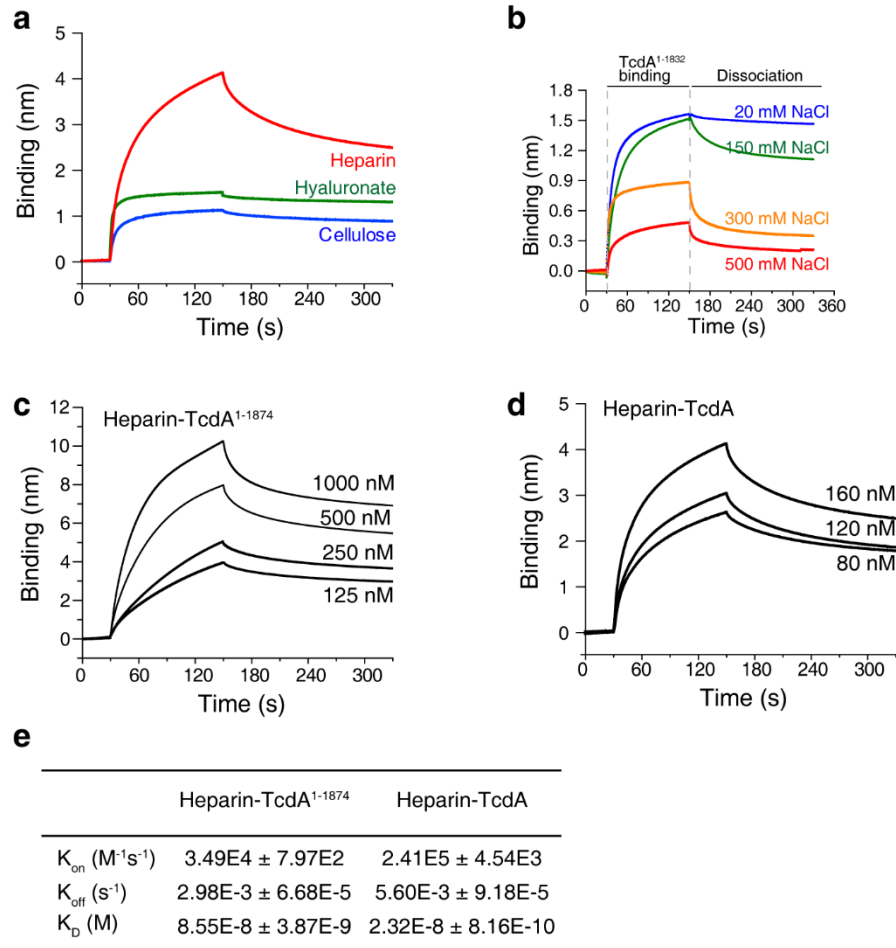

**Supplementary Figure 7. Characterizing binding of TcdA<sup>1-1874</sup> to heparin using BLI assay.**

**a.** Direct binding of full-length TcdA to immobilized biotin-heparin was analyzed using BLI assays. Biotin-hyaluronate and biotin-cellulose were analyzed in parallel as controls.

**b.** Direct binding of TcdA<sup>1-1874</sup> to immobilized heparin was sensitive to salt concentrations.

**c-e.** The binding affinity between heparin and TcdA<sup>1-1874</sup> (panel c) or between heparin and full-length TcdA (panel d) in TBS buffer (20 mM Tris-Cl, 150 mM NaCl, pH 7.5) was measured by BLI assay. The binding kinetic data were listed in panel e (n=3, Centre values represent mean. Error bars represent  $\pm$  s.d.).

Representative data was shown from two independent experiments.

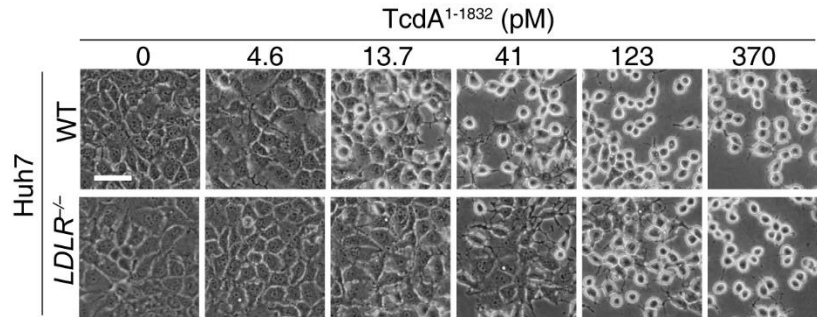

**Supplementary Figure 8. Representative images showing that Huh7 *LDLR*<sup>-/-</sup> cells are less sensitive to TcdA<sup>1-1832</sup> than WT cells.**

Huh7 *LDLR*<sup>-/-</sup> cells were less sensitive to TcdA<sup>1-1832</sup> compared with the WT cells using the cytopathic cell-rounding assays (12 h incubation). Scale bar, 50  $\mu$ m. The experiments were repeated at least three times independently with similar results.

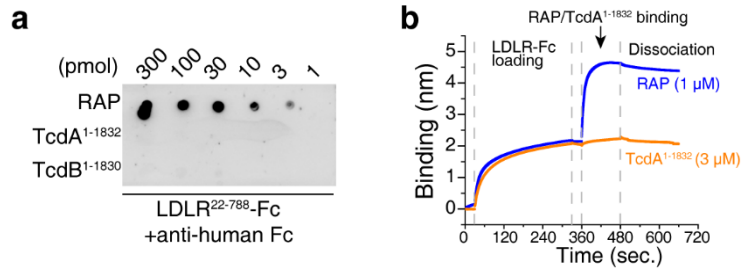

**Supplementary Figure 9. Binding of LDLR-Fc to TcdA<sup>1-1874</sup> was not detected.**

**a.** *In vitro* dot blot assays did not detect binding of LDLR-Fc to immobilized TcdA<sup>1-1874</sup>. RAP and TcdB<sup>1-1830</sup> served as positive and negative control respectively.

**b.** BLI analysis showed that 1 μM RAP robustly bound to immobilized LDLR-Fc, while TcdA<sup>1-1874</sup> at up to 3 μM had no detectable binding.

The experiments were repeated at least three times independently with similar results.

# Raw Image Figures

**Figure 3a**

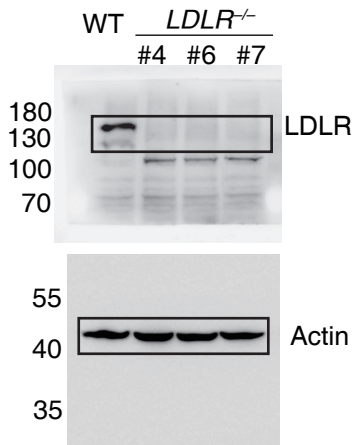

**Supplementary Figure 4a**

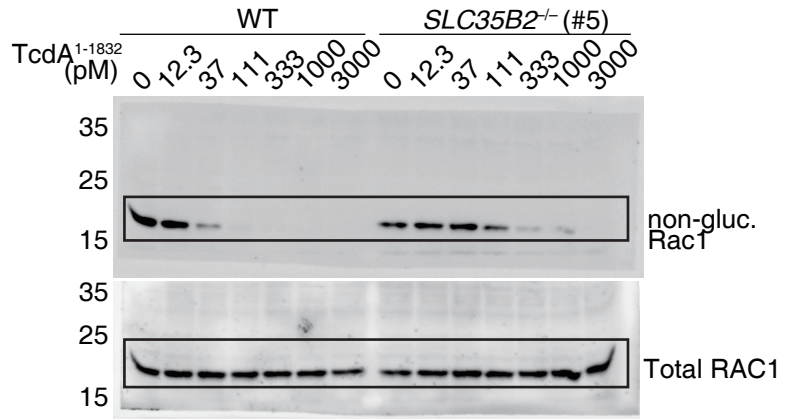

**Figure 4a**

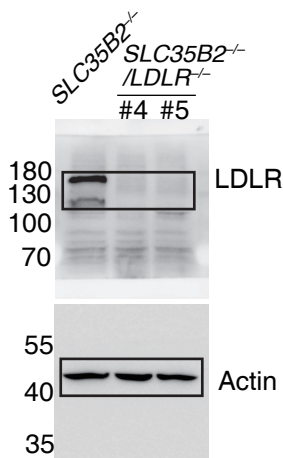

**Supplementary Figure 4b**

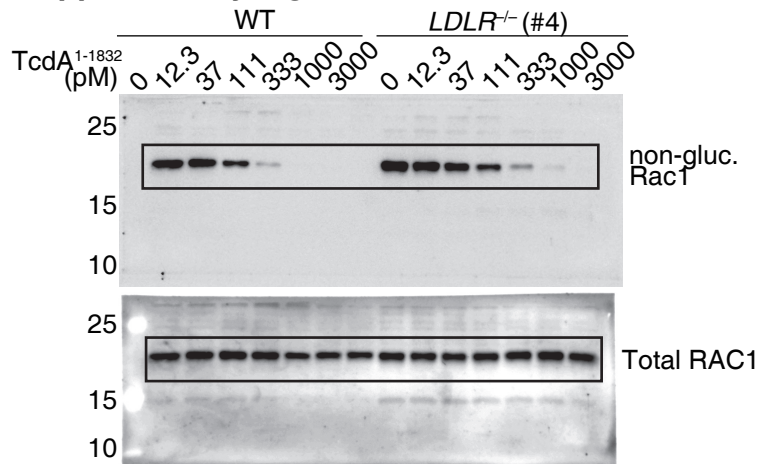

**Supplementary Figure 9a**

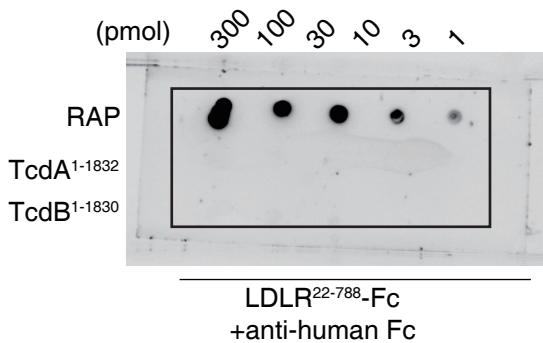

**Supplementary Figure 4c**

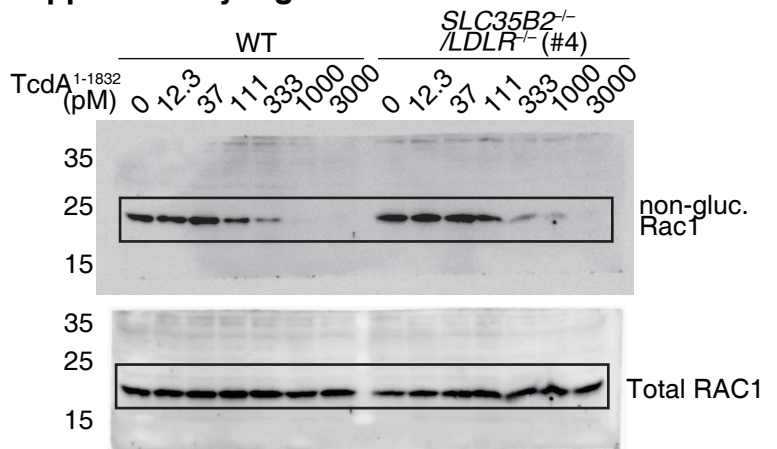

**Supplementary Data (for Figure 1) | Lists of all sgRNA sequences and target genes identified from CRISPR-Cas9 screen.**

Column A: Gene name; Column B: sgRNA code name; Column C: sgRNA sequence; Column D: NGS reads.

Sheet 1: Library A screened with TcdA<sup>1-1874</sup>.

Sheet 2: Library B screened with TcdA<sup>1-1874</sup>.
